# Supplementary material
Source: PubMed Central journal article supplement (PMC4714706)
Supplement: NIHMS750531-supplement-supplement_1.pdf [file NIHMS750531-supplement-supplement_1.pdf]

## eAppendix

**Table.** Estimated Odds Ratios for All Regression Specifications

| 30-day all cause rehospitalization                                 | Senior Care Options Service Areas |             | Excluded Deaths Within 30 Days of Discharge |             | All of Massachusetts <sup>a</sup> |             | Difference-in-Differences Estimates |             | COPD                   |             | Congestive Heart Failure |             |
|--------------------------------------------------------------------|-----------------------------------|-------------|---------------------------------------------|-------------|-----------------------------------|-------------|-------------------------------------|-------------|------------------------|-------------|--------------------------|-------------|
|                                                                    | AOR                               | 95% CI      | AOR                                         | 95% CI      | AOR                               | 95% CI      | AOR                                 | 95% CI      | AOR                    | 95% CI      | AOR                      | 95% CI      |
| Unadjusted odds ratio                                              | 1.15                              | (0.96-1.37) | 1.15                                        | (0.96-1.37) | 1.16                              | (0.98-1.38) | 0.88                                | (0.58-1.33) | 1.38*                  | (1.06-1.78) | 1.13                     | (0.81-1.58) |
| SCO participation                                                  | 1.13                              | (0.98-1.32) | 1.13                                        | (0.98-1.32) | 1.13                              | (0.96-1.33) | 1.13                                | (0.74-1.73) | 1.32**                 | (1.13-1.53) | 1.12                     | (0.89-1.41) |
| Male                                                               | 1.07*                             | (1.01-1.13) | 1.07*                                       | (1.01-1.13) | 1.08**                            | (1.03-1.13) | 1.07                                | (1.00-1.14) | 1.06                   | (0.88-1.28) | 1.04                     | (0.94-1.15) |
| White                                                              | Reference                         |             |                                             |             |                                   |             |                                     |             |                        |             |                          |             |
| Black                                                              | 0.97                              | (0.86-1.08) | 0.97                                        | (0.86-1.08) | 0.94                              | (0.85-1.05) | 1.12                                | (0.96-1.30) | 0.75*                  | (0.59-0.96) | 0.96                     | (0.82-1.13) |
| Other                                                              | 0.93                              | (0.83-1.03) | 0.93                                        | (0.83-1.03) | 0.92                              | (0.84-1.02) | 0.97                                | (0.88-1.08) | 0.91                   | (0.74-1.11) | 1.09                     | (0.98-1.22) |
| Aged 65-75 years                                                   | Reference                         |             |                                             |             |                                   |             |                                     |             |                        |             |                          |             |
| Aged 76-85 years                                                   | 0.99                              | (0.89-1.09) | 0.99                                        | (0.89-1.09) | 0.98                              | (0.90-1.07) | 0.99                                | (0.89-1.11) | 1.03                   | (0.83-1.27) | 0.96                     | (0.84-1.09) |
| Aged 86+ years                                                     | 0.84*                             | (0.71-0.99) | 0.84*                                       | (0.71-0.99) | 0.84*                             | (0.73-0.96) | 0.80**                              | (0.68-0.92) | 0.71**                 | (0.58-0.87) | 0.85**                   | (0.77-0.93) |
| Charlson comorbidity index = 0                                     | Reference                         |             |                                             |             |                                   |             |                                     |             |                        |             |                          |             |
| Charlson comorbidity index = 1                                     | 1.19**                            | (1.12-1.27) | 1.19**                                      | (1.12-1.27) | 1.18**                            | (1.12-1.25) | 1.19**                              | (1.08-1.31) | Reference <sup>b</sup> |             | Reference <sup>b</sup>   |             |
| Charlson comorbidity index = 2                                     | 1.36**                            | (1.25-1.48) | 1.36**                                      | (1.25-1.48) | 1.33**                            | (1.23-1.44) | 1.40**                              | (1.28-1.54) | 1.17                   | (1.00-1.37) | 1.04                     | (0.89-1.22) |
| Charlson comorbidity index = 3                                     | 1.52**                            | (1.46-1.58) | 1.52**                                      | (1.46-1.58) | 1.51**                            | (1.44-1.58) | 1.53**                              | (1.39-1.69) | 1.41**                 | (1.24-1.60) | 1.12                     | (0.93-1.36) |
| Charlson comorbidity index ≥4                                      | 1.57**                            | (1.45-1.70) | 1.57**                                      | (1.44-1.70) | 1.57**                            | (1.46-1.68) | 1.62**                              | (1.45-1.81) | 1.40**                 | (1.20-1.64) | 1.14                     | (0.99-1.32) |
| Medicare entitlement before age 65 years                           | 1.10                              | (0.99-1.23) | 1.10                                        | (0.99-1.23) | 1.11*                             | (1.01-1.21) | 1.04                                | (0.93-1.17) | 1.20*                  | (1.01-1.43) | 1.22**                   | (1.08-1.39) |
| Length of stay for the index hospitalization                       | 1.01*                             | (1.00-1.01) | 1.01*                                       | (1.00-1.01) | 1.03                              | (1.00-1.01) | 1.01                                | (1.00-1.01) | 0.99                   | (0.99-1.00) | 1.00                     | (0.99-1.01) |
| Index stay itself was a 30-day rehospitalization from a prior stay | 1.93**                            | (1.80-2.07) | 1.93**                                      | (1.80-2.07) | 1.93**                            | (1.81-2.06) | 2.06**                              | (1.91-2.23) | 1.95**                 | (1.73-2.20) | 1.82**                   | (1.67-1.99) |

*5 most common diagnoses from index hospitalizations:*

|                                                              |        |             |        |             |        |             |        |             |
|--------------------------------------------------------------|--------|-------------|--------|-------------|--------|-------------|--------|-------------|
| Pneumonia                                                    | 0.84** | (0.80-0.89) | 0.84** | (0.80-0.89) | 0.85** | (0.78-0.91) | 0.88** | (0.81-0.96) |
| Obstructive chronic bronchitis                               | 1.22*  | (1.01-1.46) | 1.21   | (1.00-1.46) | 1.20*  | (1.02-1.41) | 1.22   | (0.94-1.57) |
| Urine tract infection                                        | 0.88*  | (0.79-0.99) | 0.88*  | (0.79-0.99) | 0.89** | (0.81-0.97) | 0.92   | (0.80-1.06) |
| Congestive heart failure                                     | 1.12*  | (1.02-1.24) | 1.13*  | (1.02-1.24) | 1.14** | (1.05-1.23) | 1.05   | (0.96-1.14) |
| Chest pain                                                   | 0.77** | (0.68-0.88) | 0.77** | (0.68-0.88) | 0.75** | (0.66-0.85) | 0.79** | (0.69-0.92) |
| <i>5 most common procedures from index hospitalizations:</i> |        |             |        |             |        |             |        |             |
| Packed cell transfusion                                      | 1.10   | (0.93-1.30) | 1.09   | (0.92-1.29) | 1.06   | (0.93-1.21) | 1.04   | (0.92-1.18) |
| Venous catheterization                                       | 1.16** | (1.04-1.29) | 1.17** | (1.05-1.30) | 1.19** | (1.07-1.32) | 1.09   | (0.92-1.29) |
| Total knee replacement                                       | 0.91*  | (0.83-1.00) | 0.91*  | (0.83-1.00) | 0.87*  | (0.77-0.97) | 0.83*  | (0.72-0.97) |
| EGD with closed biopsy                                       | 1.10   | (0.90-1.33) | 1.09   | (0.90-1.33) | 1.07   | (0.90-1.27) | 0.93   | (0.72-1.19) |
| Percutaneous transluminal coronary angioplasty               | 0.78*  | (0.61-0.99) | 0.78*  | (0.61-0.99) | 0.81*  | (0.66-0.98) | 0.60** | (0.41-0.87) |
| N                                                            | 59,064 |             | 58,838 |             | 70,567 |             | 35,097 |             |
|                                                              | 7,427  |             | 13,309 |             |        |             |        |             |

AOR indicates adjusted odds ratio; COPD, chronic obstructive pulmonary disease; EGD, esophagogastroduodenoscopy; SCO, Senior Care Options.

“\*” indicates  $P < .05$ ; “\*\*” indicates  $P < .01$ .

<sup>a</sup>Model does not include county fixed effects.

<sup>b</sup>COPD and congestive heart failure patients have Charlson comorbidity index scores of at least 1. Therefore, the reference group consists of those who had COPD or CHF, respectively, but no other comorbidities. Likewise, these models do not include the 5 most common diagnoses and procedures since they are stratified by specific diagnoses.
